# Supplementary material for: In situ characterization of the coordination sphere of CuII complexes supported on silica during the preparation of Cu/SiO2 catalysts by cation exchange
Source: Royal Society of Chemistry journal article supplement (doi:10.1039/a909427j), 2000-01-01
Supplement: supplementary_material.doc [file supplementary_material.doc]

**SUPPLEMENTARY MATERIALS**

*a. XANES and EXAFS measurements*

The spectra were recorded at room temperature in the transmission mode using two air-filled ionization chambers. For the XANES measurements, a double crystal Si (311) monochromator was used and the energies were scanned with 0.3 eV steps from 8960 to 9100 eV. For the EXAFS measurements, a double crystal Si (111) monochromator was used and the energies were scanned with 2 eV steps from 8900 to 9900 eV, but a trace amount of zinc impurities found in some samples has limited the available energy range up to the Zn K edge at 9659 eV, i.e., to k =13 Å-1 (k is the photoelectron wavenumber). The energy was calibrated using a Cu metal foil reference. For each sample, the XANES spectrum was recorded three times and the EXAFS spectrum, at least ten times.

*b. EXAFS analysis*

The (k) functions were extracted from the data following the procedure proposed by Lengeler and Eisenberger (*Phys. Rev. B*, 1980, **21**, 4507) using a linear preedge background and a combination of polynomials and Spline atomic absorption background. The energy threshold, Eo, was taken at the maximum of the absorption edge. Eo has been corrected for each spectrum in the fitting procedure.

The Fourier transforms (FT) were calculated on w(k)k3(k) where w(k) is a Kaiser-Bessel window with a smoothness parameter equal to 3. The k limits are 2.2 and 13 Å-1. In this work, the FT's are presented without phase correction.

The data analysis was obtained in the framework of single scattering curved wave approximation. Single scattering fits of experimental curves to theoretical models were performed on filtered spectra using the standard EXAFS formula:

where the summation was performed over all the filtered contributions. So2 is the inelastic reduction factor (So2 =1 in our fits), Ni the number of backscatterers at a distance Ri from the central Cu atom and i the Gaussian Debye-Waller factor for the backscatterers i. i(k) =1/i)[(h/k)4 + k] is the mean free path of the photoelectron and i the constant of the mean free path. k =[8p2me(E-Eo)/h2)]1/2 and h is a constant equal to 3.1. The functions |fi(k,Ri)| (amplitude) and |i(k,Ri)| (phase shift) were calculated using McKale's amplitude and phase theoretical functions (*J. Am. Chem. Soc.*, 1988,**110**, 3763).

*c. EXAFS spectra of the ECuNH3 sample*


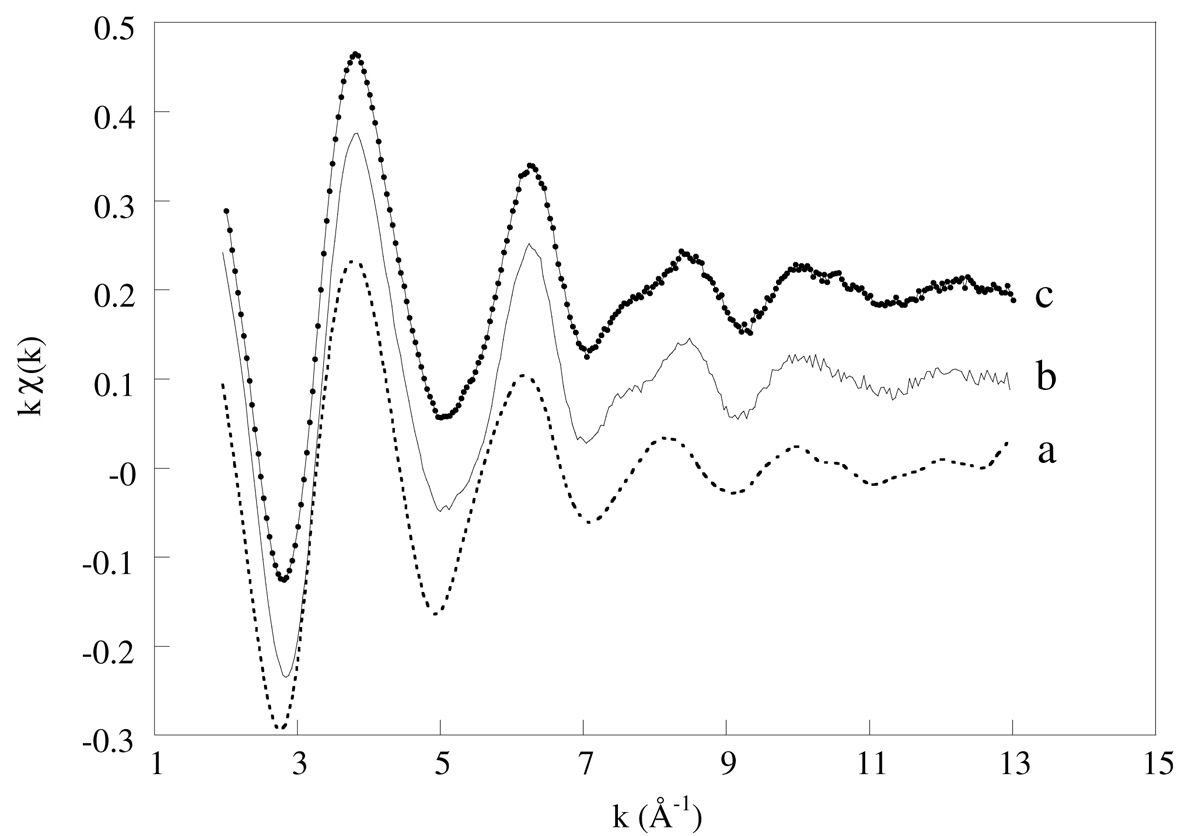
Figure 1: EXAFS spectra recorded at 25 °C of the ECuNH3 sample after

(a) washing with water (wet sample);

(b) drying in air at 25 °C;

(c) drying under vacuum at 100 °C for 24 h.

*d. Validity of the EXAFS analysis within the framework of single scattering treatments*

We have checked our EXAFS results obtained for the ECu(NH3) sample dried in air at 25°C, with a procedure similar to that used by Bélan et al. (*Phys. Chem. Chem. Phys.*, 1999, **1**, 605). Using the FEFF7 Code (Zabinsky et al., *Phys. Rev. B*, 1995, **52**, 2995), we calculated, with and without multiple scattering contributions, the EXAFS signals and the corresponding FT's of a CuN2(OSi)2 cluster whose Cu-(N,O) and Si-O distances were fixed to 1.96 Å (our result) and 1.62 Å (common distance for Si-O, used by Bélan et al.), respectively; the Cu-O-Si angle was varied between 180 and 120°. The calculations show that the best fit with the experimental EXAFS signals is obtained for a Cu-O-Si angle equal to 123°, which corresponds to a Cu-Si distance of 3.15 Å, i.e., the same as that obtained with our former fits (Table 2). The fit is also very good in the R space (both the modulus and imaginary parts of the Fourier transforms), and even better with single scattering.

*e. UV-Visible spectra of the ECuen1 (A) and ECuen2 (B) samples*

A

B

Figure 2: UV-Visible spectra of the ECuen1 (A) and ECuen2 (B) samples recorded after

(a) filtration;

(b) washing;

(c) drying in air at 25 °C;

(d) drying under vacuum at 100 °C for 56 h, then exposure to air;

(e) drying under vacuum at 25 °C;

(f) drying under vacuum at 100 °C for 56 h.

The experiments were in fact performed in the following order: (a), (b), (c), (e), (f) and (d).

*f. ESR spectra of the ECuen1 (A) and ECuen2 (B) samples*

A

B

Figure 3: ESR spectra of the ECuen1 (A) and ECuen2 (B) samples recorded after

(a) drying in air at 25 °C;

(b) drying under vacuum at 100 °C for 56 h, then exposure to air;

(c) drying under vacuum at 25 °C;

(d) drying under vacuum at 100 °C for 56 h.

Dashed lines: simulated spectra.

The experiments were in fact performed in the following order: (a), (c), (d) and (d).
